# Supplementary material for: Exogenous Cripto-1 Suppresses Self-Renewal of Cancer Stem Cell Model
Source: PubMed Central journal article supplement (PMC6274844; doi:10.3390/ijms19113345), 2018-10-26
Supplement: ijms-19-03345-s001.pdf [file ijms-19-03345-s001.pdf]

## Supplementary Materials: Exogenous Cripto-1 Suppresses Self-renewal of Cancer Stem Cells Model

Md Jahangir Alam, Ryota Takahashi, Said M Afify, Aung Ko Ko Oo, Kazuki Kumon, Hend M Nawara, Aprilliana Cahya Khayrani, Juan Du, Maram H Zahra, Akimasa Seno, David S. Salomon and Masaharu Seno

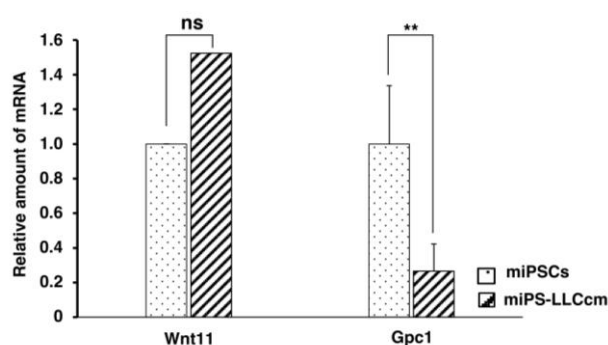

**Figure S1.** Evaluation of the expression of Wnt11 (A) and Gpc1 (B) in miPS-LLCcm cells by rt-qPCR. GAPDH was used as endogenous control and each bar represent mean  $\pm$  SD of three data points. Student's t-test was used to measure the level of significance. (\*\* $p < 0.01$ ; ns, not significant).

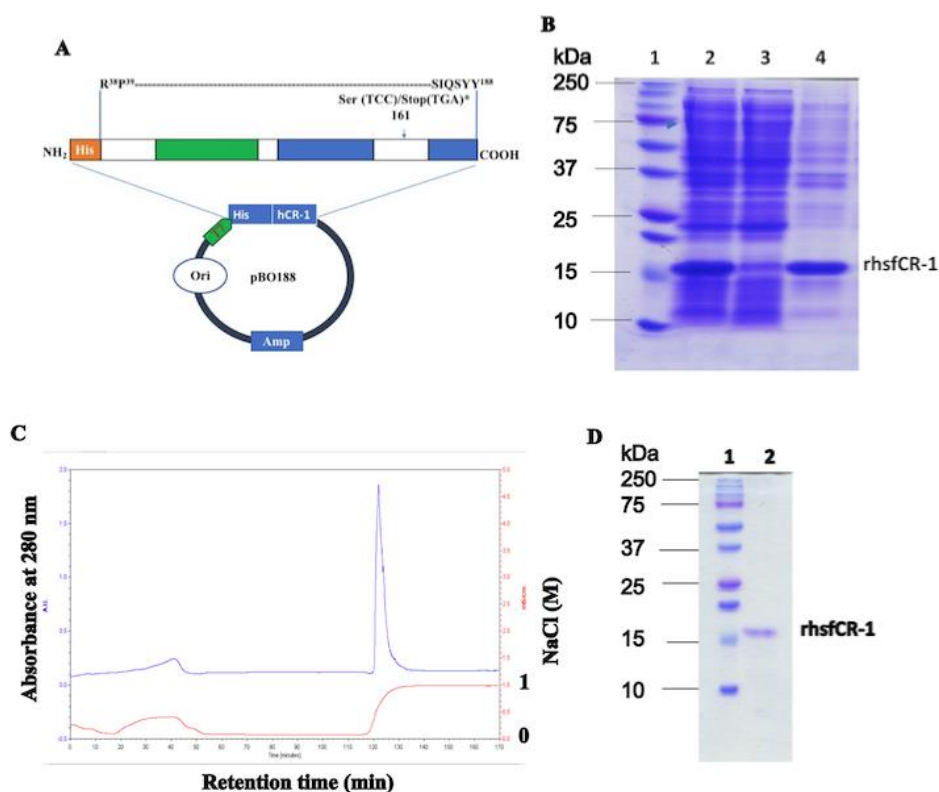

**Figure S2.** Expression and purification of rhsfCR-1. (A) Schematic drawing of recombinant human Cripto-1 construct fused to a His-tag. Site-directed mutagenesis was carried out in plasmid pBO188 to have S<sup>161</sup> codon to a stop codon at 161 to express under the control of T7 promoter (\*resultant plasmid named as pBO1801); (B) SDS-PAGE analysis of the transformant expressing rhsfCR-1. Lane 1, molecular weight markers; 2, whole cell lysate; 3, soluble fraction of whole cell lysate; 4, inclusion bodies; (C) chromatographic isolation of rhsfCR-1 through CM650M cation exchange column under a

gradient of NaCl; (D) SDS-PAGE of purified refolded rhsfCR-1 protein. Lane 1, molecular weight markers; 2, purified rhsfCR-1.

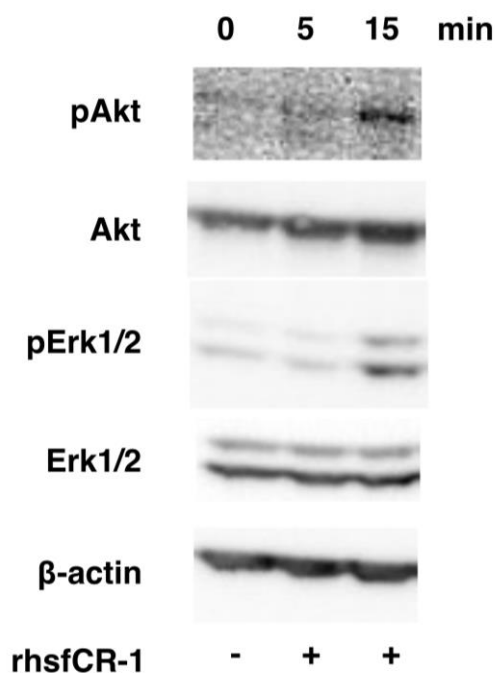

**Figure S3.** Akt and Erk1/2 phosphorylation assay in miPS-LLCcm cells. Western blot was performed to detect phosphorylation status of Akt and Erk1/2 in miPS-LLCcm cells, treated with 1 μg/ml rhCR-1 for 5 and 15 min in the absence of serum after serum starvation. Beta-actin was used as a control.

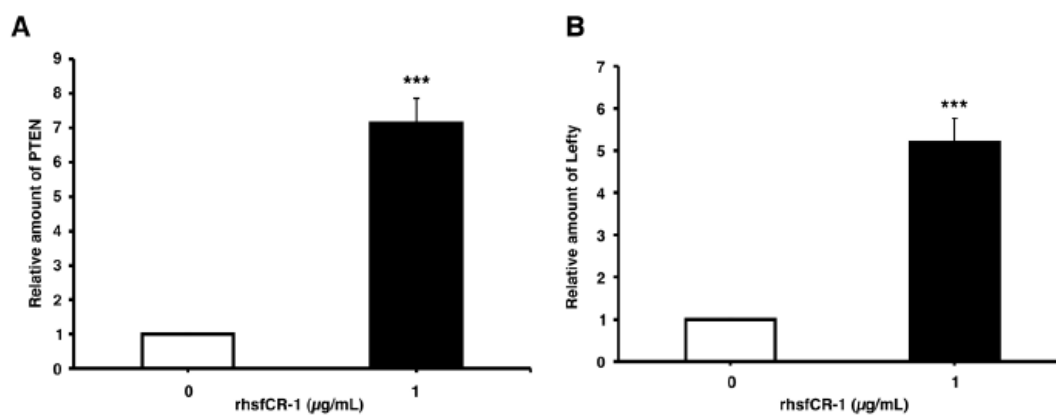

**Figure S4.** Evaluation of the expression of PTEN (A) and Lefty (B) in miPS-LLCcm cells on adherent culture after 24 h of treatment with rhsfCR-1 by rt-qPCR. GAPDH was used as endogenous control and each bar represent mean  $\pm$  SD of three data points. Student t-test were conducted to analysis the level of significance (\*\*\*) ( $p < 0.001$ ).

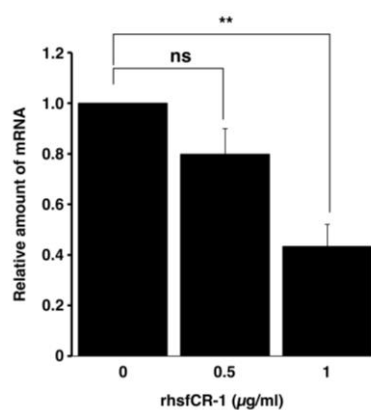

**Figure S5.** rt-qPCR analysis of Beta-catenin in miPS-LLCcm cells on adherent culture after 24 h of treatment with rshfCR-1. GAPDH was used as endogenous control and each bar represent mean  $\pm$  SD of three data points. Student's t-test was used to measure the level of significance. (\*\* $p < 0.01$ ; ns, not significant).

**Table S1.** Limiting dilution analysis for sphere formation

| Group   | Cells plated per well | Number of wells positive | Sphere-forming frequency (95% CI) |
|---------|-----------------------|--------------------------|-----------------------------------|
| 0 µg/ml | 100                   | 80/84                    |                                   |
| 0 µg/ml | 10                    | 12/84                    | 1/40 (1/51 - 1/32)                |
| 0 µg/ml | 1                     | 2/84                     |                                   |
| 1 µg/ml | 100                   | 69/84                    |                                   |
| 1 µg/ml | 10                    | 5/84                     | 1/69 (1/87 - 1/54) **             |
| 1 µg/ml | 1                     | 0/84                     |                                   |

**Table S2.** List of primers used in the experiments.

| No | Names                     | Forward Primer Sequence (5'→3')                  | Reverse Primer Sequence (5'→3')                  |
|----|---------------------------|--------------------------------------------------|--------------------------------------------------|
| 1  | Nanog                     | AGGGTCTGCTACTGAGATGCTCTG                         | AACCCAAGCACGTATCAGGG                             |
| 2  | Oct3/4                    | TCTTTCCACCAGGCCCGGCTC                            | TGCGGGCGGACATGGGGAGATCC                          |
| 3  | Sox2                      | TAGAGCTAGACTCCGGGCGATGA                          | TTGCCTTAAACAAGACCACGAAA                          |
| 4  | Klf4                      | GGACTTACAAAATGCCAAGGGGTG                         | TCGCTTCCTCTCTCCGACACA                            |
| 5  | c-Myc                     | TGACCTAACTCGAGGAGGAGCTGG<br>AATC                 | AAGTTTGAGGCAGTAAAATTATGGCTGA<br>AGC              |
| 6  | E-cadherin                | AACCCAAGCACGTATCAGGG                             | GGGGTCTGTGACAACAACGA                             |
| 7  | Snail                     | GGAGTTGACTACCGACCTTGC                            | TGGAAGGTGAACTCCACACAC                            |
| 8  | MMP2                      | CAAGTTCGCCGCGATGTC                               | TTCTGGTCAAGGTCACCTGTC                            |
| 9  | MMP9                      | CTGGACAGCCAGACACTAAAG                            | CTCGCGGCAAGTCTTCAGAG                             |
| 10 | Twist1                    | GCCGGAGACCTAGATGTCATTGT                          | TTAAAAGTGTGCCCCACGCC                             |
| 11 | Twist2                    | CTCACGAGCGTCTCAGCTAC                             | TTGTCCAGGTGCCGAAAAGTC                            |
| 12 | CD31                      | AAC TCC TTC ACC ATC AAC AGC<br>ATC               | AAT GAC GTA GCT CTC GGT GTG                      |
| 13 | Cripto-1                  | GGGGTACTTCTCATCCAGTGTG                           | ACTGTTCTGTATCCCCACGG                             |
| 14 | Nodal                     | ATTTGCCAGACAGAAGCCAAC                            | TCCTCCACAATCATGTCCTTG                            |
| 15 | ALK4                      | CTCAATGGAAGGGTCCGAGG                             | GGGACCAAACGATACATGGC                             |
| 16 | ACVR2B                    | ACGACTTTGTGGCTGTGAAG                             | CAGTTCGTCCACGTGATGATG                            |
| 17 | GRP78                     | GTGTGTGAGACCAGAACCGT                             | GCAGTCAGGCAGGAGTCTTA                             |
| 18 | GADPH                     | AACGGCACAGTCAAGGCCGA                             | ACCCTTTGGCTCCACCCTT                              |
| 19 | PTEN                      | CCTGCAGAAAGACTTGAAGGTGT                          | CAAAAGGATACTGTGCAACTCTGC                         |
| 20 | Lefty1                    | AGCTCAAGGCAATTGTGACC                             | TCATCTCTGAGGCGACACAC                             |
| 21 | Wnt11                     | ACACTGTAAACAGCTGGAGGG                            | CGTGTACCTCTCTCCAGGTCAA                           |
| 22 | Gpc1                      | AGGATGCTAGTGATGACGGC                             | AGCTGAGGTCTTCTGTCCCT                             |
| 23 | p21                       | GCCCCGAGAACGGTGGAAGTT                            | GACAAGGCCACGTGGTCCTC                             |
| 24 | Beta catenin              | TCCCATCCACGCAGTTTGAC                             | TCCTCATCGTTTAGCAGTTTTGT                          |
| 25 | Cripto-1<br>(mutagenesis) | GAG CAC CTC GTG GCT TGA AGG<br>ACT CCA GAA CTA C | GTA GTT CTG GAG TCC TTC AAG CCA<br>CGA GGT GCT C |
| 26 | T7<br>(Sequencing)        | Promoter primer<br>(TAATACGACTCACTATAGG)         | Terminator primer<br>(GCTAGTTATGCTCAGCGG)        |

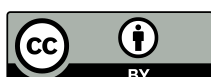

© 2018 by the authors. Submitted for possible open access publication under the terms and conditions of the Creative Commons Attribution (CC BY) license (<http://creativecommons.org/licenses/by/4.0/>).
